# Supplementary material for: A comparison of rapid and conventional measures of indicator bacteria as predictors of waterborne protozoan pathogen presence and density
Source: Royal Society of Chemistry journal article supplement (doi:10.1039/c1em10379b), 2011-01-01
Supplement: c1em10379b.pdf [file c1em10379b.pdf]

### Supplementary Data

Supplementary Table 1 - Results of enterococci qPCR blank samples

| Density, CCE/100mL | Field Blank | Method Blank | Total Blanks | Percentage |
|--------------------|-------------|--------------|--------------|------------|
| 0                  | 128         | 197          | 325          | 82.9%      |
| ≤100               | 19          | 32           | 51           | 13.0%      |
| >100               | 10          | 6            | 16           | 4.1%       |
| Totals             | 157         | 235          | 392          |            |

Supplementary Table 2 - Results of *E. coli* qPCR blank samples

| Density, CCE/100mL | Field Blank | Method Blank | Total Blanks | Percentage |
|--------------------|-------------|--------------|--------------|------------|
| 0                  | 43          | 53           | 96           | 44.6%      |
| ≤1000              | 12          | 38           | 50           | 23.3%      |
| >1000              | 20          | 49           | 69           | 32.1%      |
| Totals             | 75          | 140          | 215          |            |

Supplementary Table 3 - Results of enterococci culture, field blank samples

| Density, CFU/100mL | Total Blanks | Percentage |
|--------------------|--------------|------------|
| 0                  | 142          | 81.6%      |
| ≤10                | 19           | 10.9%      |
| >10                | 13           | 7.5%       |
| Totals             | 174          |            |

Supplementary Table 4 - Results of *E. coli* culture, field blank samples

| Density, CFU/100mL | Total Blanks | Percentage |
|--------------------|--------------|------------|
| 0                  | 159          | 90.9%      |
| ≤10                | 10           | 5.7%       |
| >10                | 6            | 3.4%       |
| Totals             | 175          |            |

Supplementary Table 5 - Recovery from spiked samples

|                  | <i>E. coli</i><br>culture | <i>E. coli</i><br>qPCR | Entero<br>culture | Entero<br>qPCR | <i>Giardia</i> | <i>Crypto</i> |
|------------------|---------------------------|------------------------|-------------------|----------------|----------------|---------------|
| No. of samples   | 136                       | 32                     | 117               | 167            | 61             | 61            |
| Mean. % recovery | 63.4%                     | 42.1%                  | 80.5%             | 89.5%          | 20.9%          | 24.2%         |
| EPA criteria     | 17-117%                   |                        | 63-110%           |                | 15-118%        | 13-111%       |
